# Supplementary material for: A Ni3V2O8@g-CN nanocomposite-based p-n heterojunction: mechanistic insights into photocatalytic activation of the inert C(sp3)–H bond
Source: Royal Society of Chemistry journal article supplement (doi:10.1039/d3se00413a), 2023-01-01
Supplement: d3se00413a1.pdf [file d3se00413a1.pdf]

## Electronic Supplementary Information

### **Ni<sub>3</sub>V<sub>2</sub>O<sub>8</sub>@g-CN nanocomposite-based p-n heterojunction: Mechanistic insights on photocatalytic activation of inert C(sp<sup>3</sup>)-H bond**

**Anjali Verma<sup>a</sup>, Arpna Jaryal<sup>a</sup>, Deepak Kumar Chauhan<sup>a</sup>, Venugopala Rao Battula<sup>a</sup>, Madhurima Sarkar<sup>b</sup>,  
Abhijit Patra<sup>b</sup>, Kamalakannan Kailasam<sup>\*a</sup>**

<sup>a</sup>Advanced Functional Nanomaterials, Institute of Nano Science and Technology (INST), Knowledge city, Sector-81, 140306 Manauli, SAS Nagar, Mohali, Punjab, India

<sup>b</sup>Department of Chemistry, Indian Institute of Science Education and Research Bhopal, Bhopal Bypass Road, Bhauri, Bhopal 462066, Madhya Pradesh, India

**Corresponding Author \*e-mail: [kamal@inst.ac.in](mailto:kamal@inst.ac.in), [kkamal17@gmail.com](mailto:kkamal17@gmail.com)**

## 1. Characterization

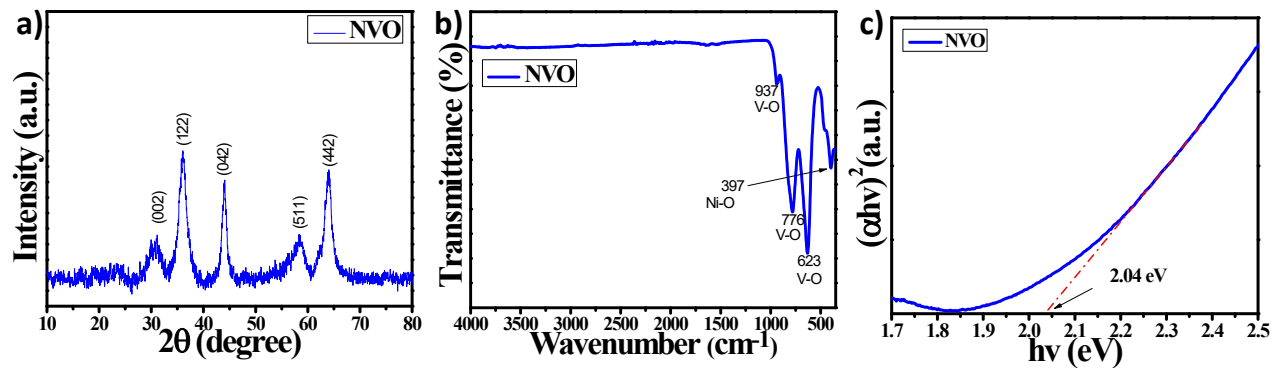

Figure S1 a) XRD pattern, b) FTIR spectra, and c) Tauc plot of NVO.

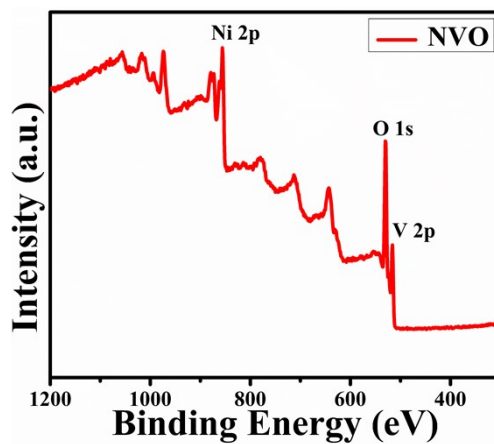

Figure S2 XPS Survey scan of NVO.

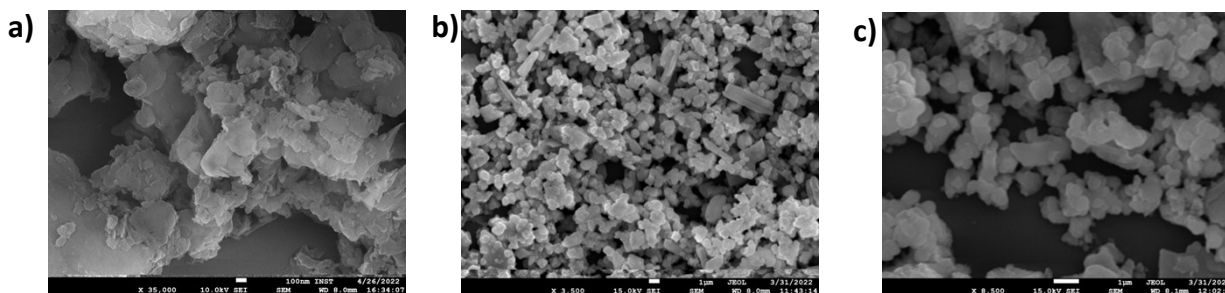

Figure S3 a) FESEM image of g-CN, b) & c) FESEM images of NVO.

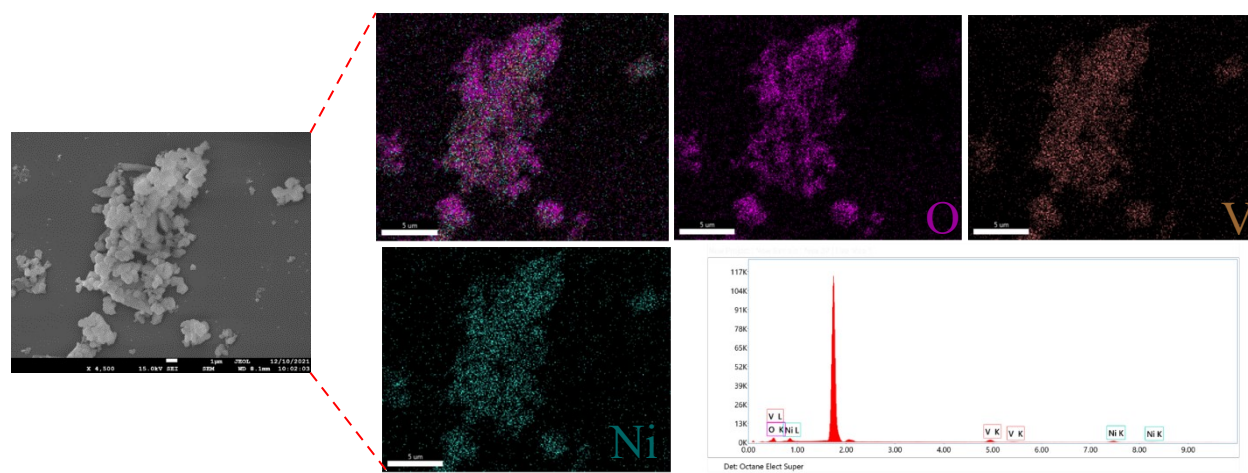

Figure S4 Elemental mapping and EDX of NVO.

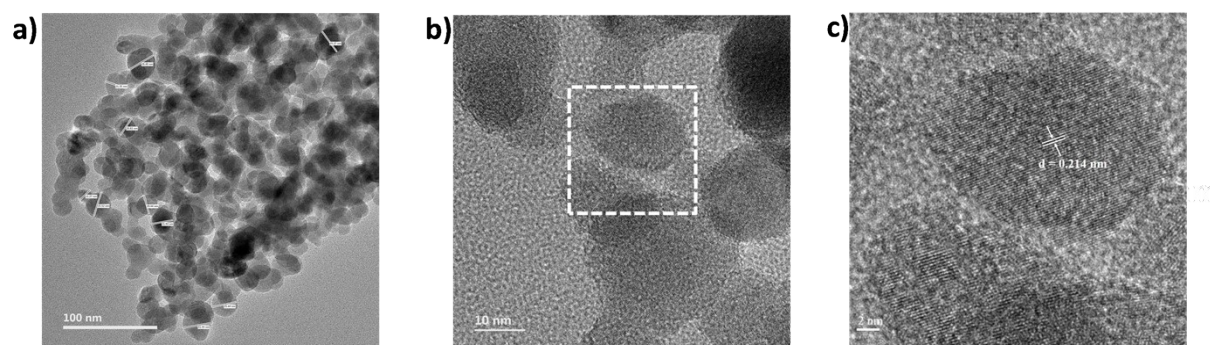

Figure S5 a) TEM and b) & c) HRTEM images of NVO.

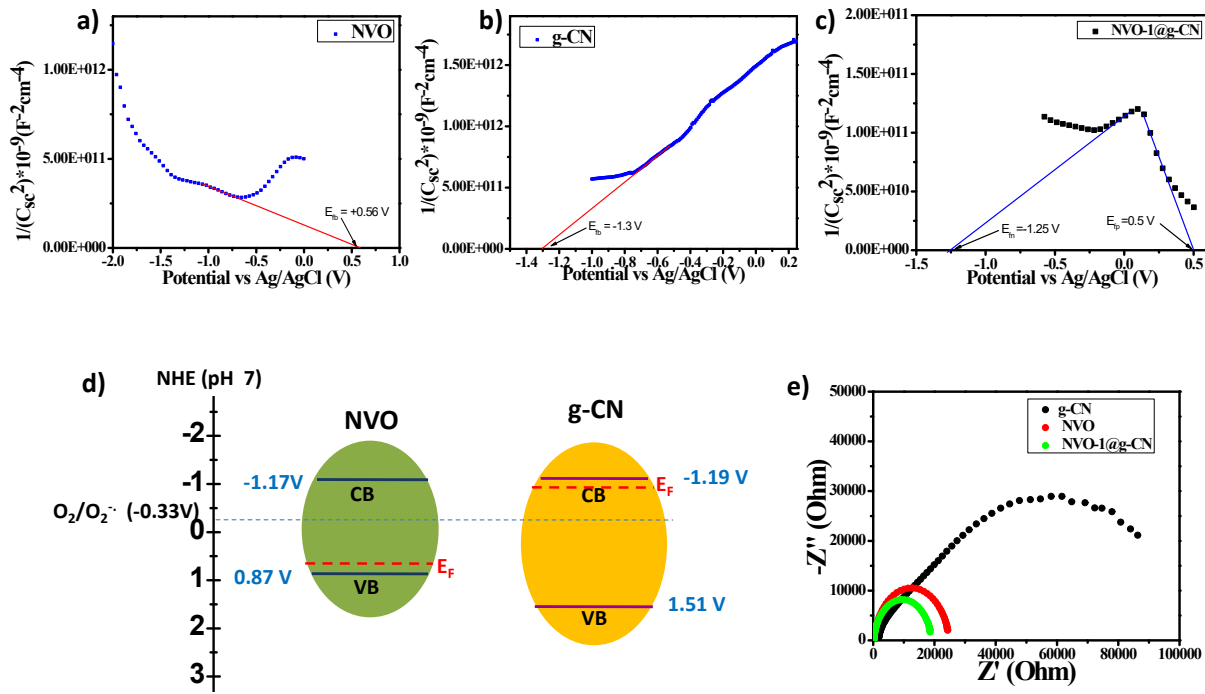

Figure S6 Mott-Schottky plot of a) NVO, b) g-CN and c) NVO-1@g-CN, d) Band structure of NVO and g-CN and e) Nyquist plot of NVO, g-CN and NVO-1@g-CN.

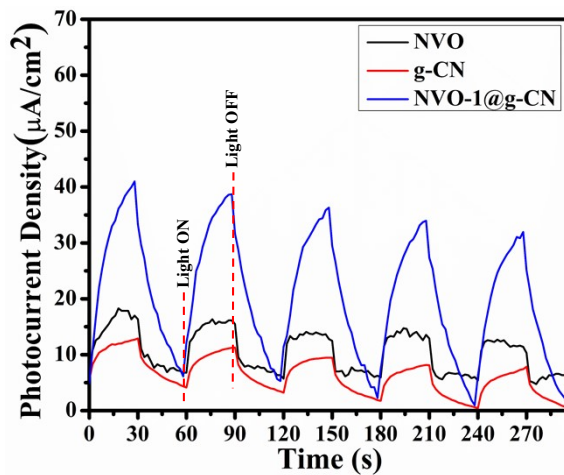

Figure S7 Transient Photocurrent response NVO, g-CN and NVO-1@g-CN.

## 2. Comparison table for cyclohexane oxidation

Table S1 Photocatalytic oxidation of cyclohexane catalyzed by various catalysts.

| S.No. | Catalyst                     | Reaction conditions                                                                      | Light source          | Yield ( $\mu\text{mol.g}^{-1}.\text{h}^{-1}$ ) |              | Cyclohexanone selectivity (%) | Ref          |
|-------|------------------------------|------------------------------------------------------------------------------------------|-----------------------|------------------------------------------------|--------------|-------------------------------|--------------|
|       |                              |                                                                                          |                       | Cyclohexanone                                  | Cyclohexanol |                               |              |
| 1     | NVO-1@g-CN                   | 5 mg catalyst, 5 ml cyclohexane                                                          | Solar simulator       | 66.6                                           | 4.6          | 93.4                          | Present work |
| 2     | BiVO <sub>4</sub>            | 50 mg catalyst, 5 mmol of cyclohexane, 5 ml ACN, 0.1 ml HCl                              | W-Br lamp             | 15.5 % conversion of cyclohexane               |              | 71                            | 1            |
| 3     | Cu/g-CN                      | 5 mg catalyst, 10 mmol of cyclohexane, 5 ml ACN, 20 mmol H <sub>2</sub> O <sub>2</sub> . | Xe Lamp, Full arc     | 37 % conversion of cyclohexane                 |              | 94                            | 2            |
| 4     | Au/g-CN                      | 500 mg catalyst, 10 ml cyclohexane, 200 ml H <sub>2</sub> O, 60°C                        | Xe Lamp, Full arc     | 10 % conversion of cyclohexane                 |              | 100                           | 3            |
| 5     | Sulphated vanadium doped TS1 | 50 mg catalyst, 5 mmol cyclohexane, 5 ml ACN +0.1 ml HCL                                 | W-Br Lamp (UV filter) | 3.4 % conversion of cyclohexane                |              | 100                           | 4            |

Table S2 Photocatalytic oxidation of cyclohexane catalysed under different reaction conditions by NVO-1@g-CN.

| S.No. | Reaction conditions                                                                         | Yield ( $\mu\text{mol.g}^{-1}.\text{h}^{-1}$ ) |              | Selectivity (%) |              |
|-------|---------------------------------------------------------------------------------------------|------------------------------------------------|--------------|-----------------|--------------|
|       |                                                                                             | Cyclohexanone                                  | Cyclohexanol | Cyclohexanone   | Cyclohexanol |
| 1     | 5 mg catalyst, 5 ml ACN, 5 mmol cyclohexane, 0.1 ml HCL, O <sub>2</sub>                     | 134                                            | 834          | 14              | 86           |
| 2     | 5 mg catalyst, 5 ml ACN, 10 mmol cyclohexane, 20 mmol H <sub>2</sub> O <sub>2</sub> , 60 °C | 167                                            | 2500         | 6.3             | 93.7         |

|   |                                                               |     |     |      |      |
|---|---------------------------------------------------------------|-----|-----|------|------|
| 3 | 5 mg catalyst, 4 ml H <sub>2</sub> O, 2 ml cyclohexane, 60 °C | 8   | 103 | 6.9  | 93.1 |
| 4 | 5 mg catalyst, 5 ml cyclohexane, 60 °C, O <sub>2</sub>        | 167 | 367 | 31.3 | 68.7 |

### 3. Experimental Analysis

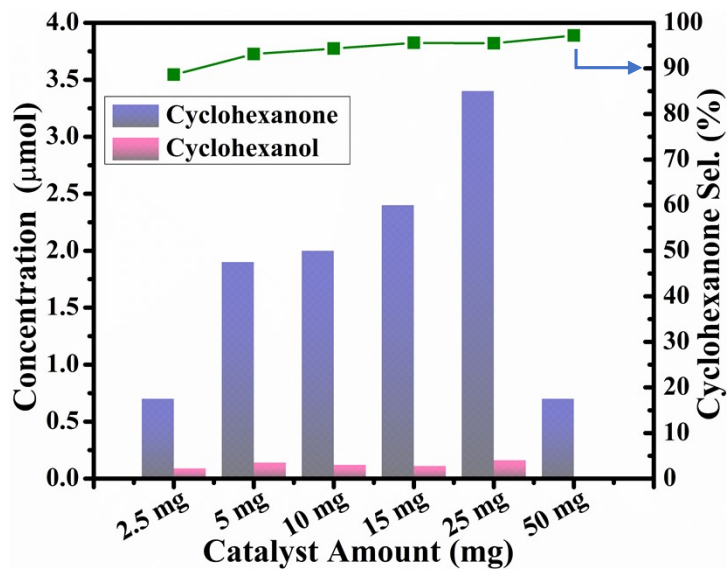

Figure S8 Photocatalyst optimization for photocatalytic oxidation of cyclohexane to cyclohexanone for NVO-1@g-CN. Reaction conditions: cyclohexane - 5 mL; Oxygen atmosphere; Reaction time – 6h; Oriol Solar Simulator, & 100 mW cm<sup>-2</sup>. Selectivity of cyclohexanone (%) = (cyclohexanone / (cyclohexanone + cyclohexanol)) \* 100.

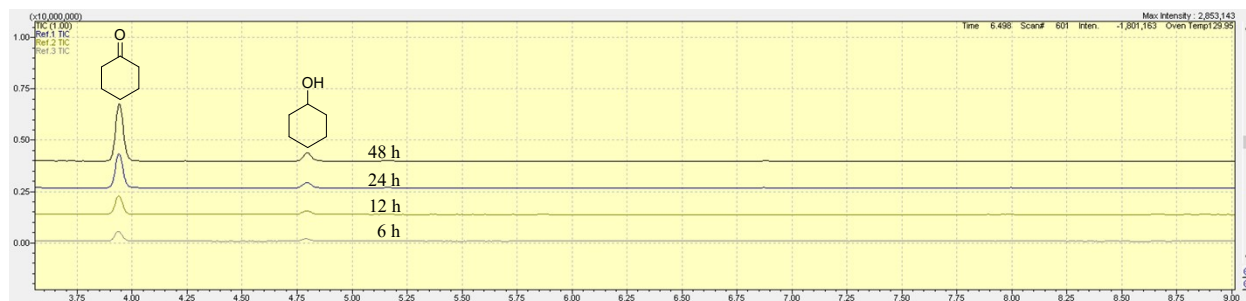

Figure S9 GC-MS graph for cyclohexane photo-oxidation by NVO-1@g-CN for 6h, 12h, 24h and 48h.

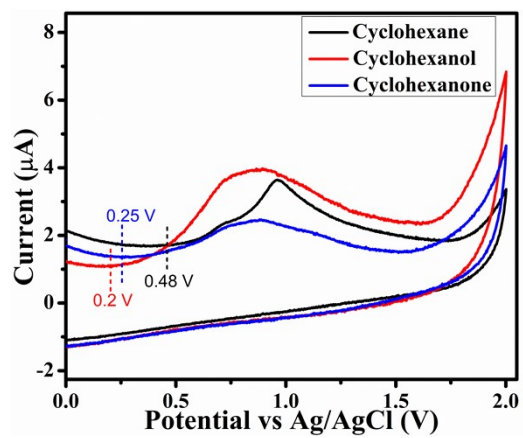

Figure S10 Cyclic voltammetry plot of cyclohexane, cyclohexanol and cyclohexanone.

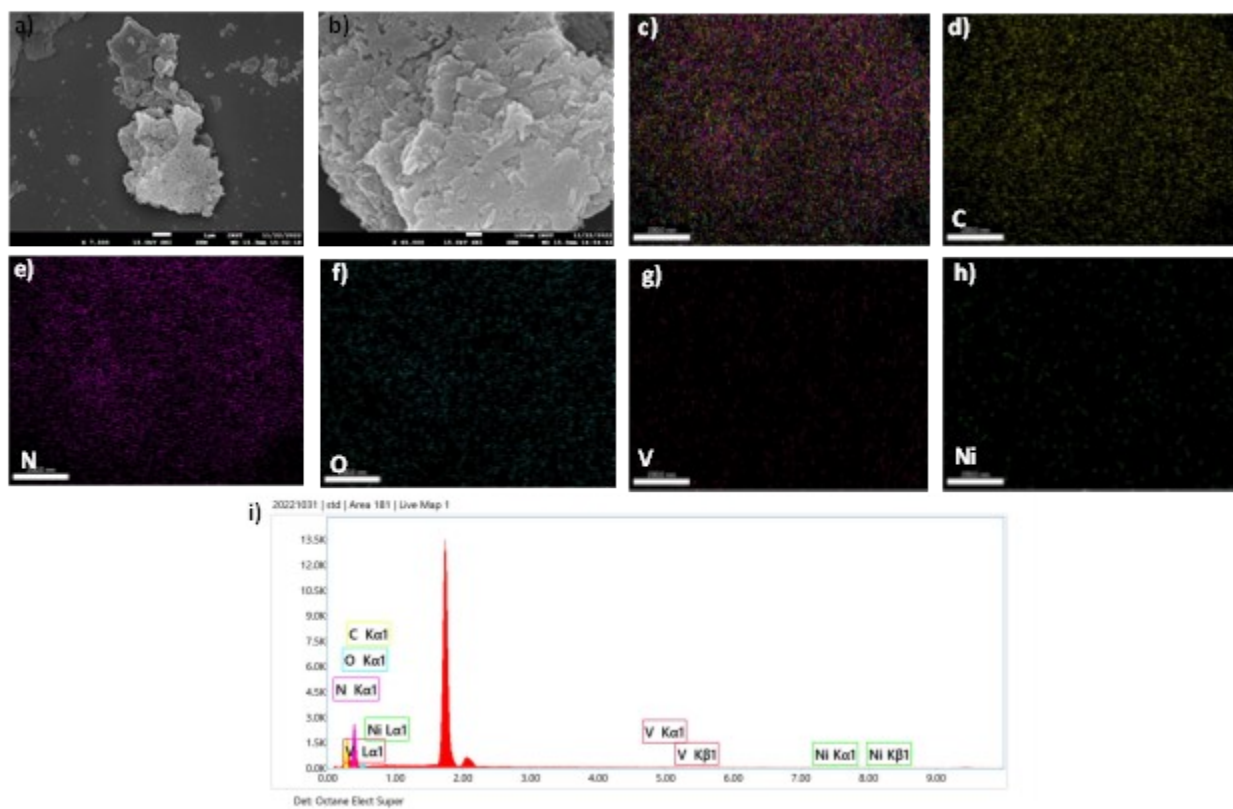

Figure S11 a) and b) FESEM images; c) to h) Elemental mapping and i) EDX of NVO-1@g-CN after 4 cycles.



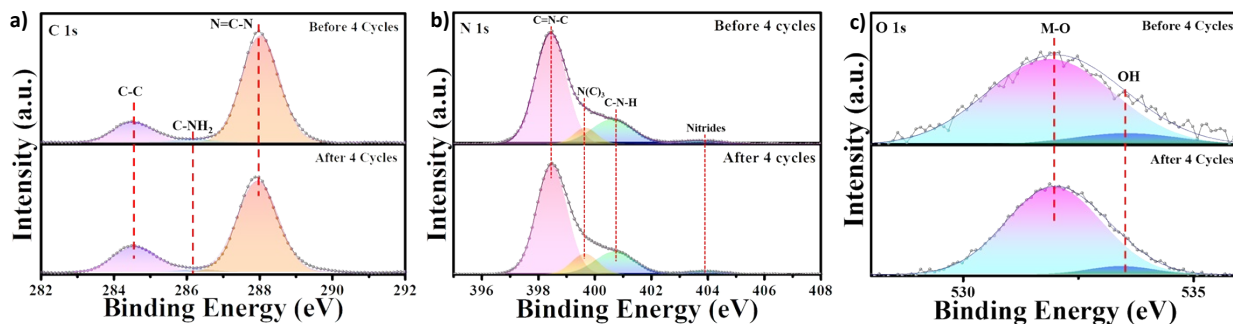

Figure S12 a) C1s spectrum b) N1s spectrum and c) O1s spectrum of NVO-1@g-CN nanocomposite before and after 4 cycles.

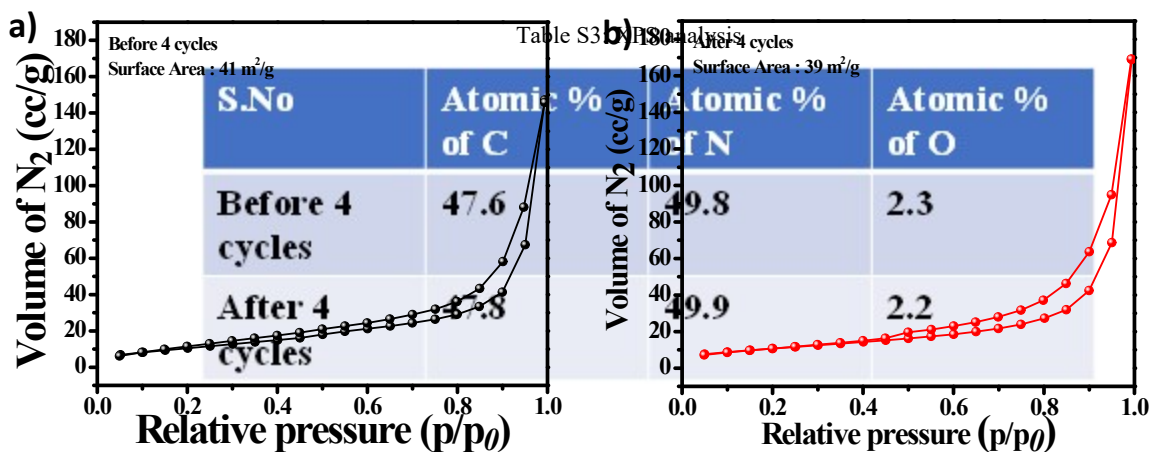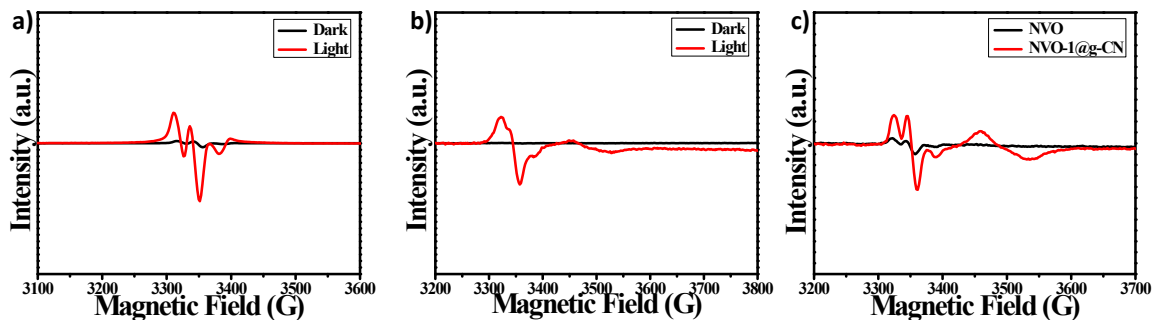

Figure S14 EPR spectra of a)  $^1\text{O}_2$  using NTPD and b)  $\text{O}_2^{\cdot-}$  using DMPO for NVO-1@g-CN and c) Cyclohexyl radical using PBN for NVO and NVO-1@g-CN.

Figure S13:  $\text{N}_2$  adsorption and desorption isotherm of NVO-1@g-CN a) before 4 cycles and b) after 4 cycles.



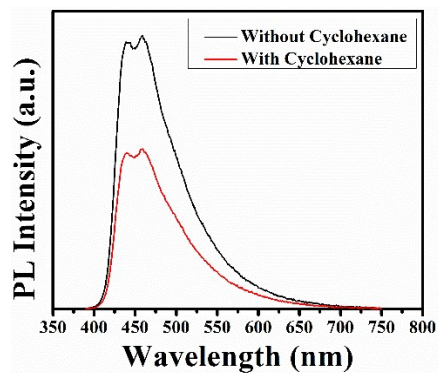

Figure S15 Photoluminescence (PL) spectra of NVO-1@g-CN before and after addition of cyclohexane.

## References:

- 1 L. Xiang, J. Fan, W. Zhong, L. Mao, K. You and D. Yin, *Appl. Catal. A Gen.*, 2019, **575**, 120–131.
- 2 A. Shahzeydi, M. Ghiaci, H. Farrokhpour, A. Shahvar, M. Sun and M. Saraji, *Chem. Eng. J.*, 2019, **370**, 1310–1321.
- 3 J. Liu, Y. Yang, N. Liu, Y. Liu, H. Huang and Z. Kang, *Green Chem.*, 2014, **16**, 4559–4565.
- 4 W. Zhong, T. Qiao, J. Dai, L. Mao, Q. Xu, G. Zou, X. Liu, D. Yin and F. Zhao, *J. Catal.*, 2015, **330**, 208–221.
